# Supplementary material for: Differences in Pathological Composition Among Large Artery Occlusion Cerebral Thrombi, Valvular Heart Disease Atrial Thrombi and Carotid Endarterectomy Plaques
Source: Front Neurol. 2020 Aug 7;11:811. doi: 10.3389/fneur.2020.00811 (PMC7427050; doi:10.3389/fneur.2020.00811)
Supplement: Supplementary file 1 [file Table_1.XLSX]

## Sheet: result1028
number	Toast	toast.group	rongsuan	Heartdisease	naogengshi	fangchan	hypertension	gaoxuezhi	diabetes	smoking	drinking	inbed	NIHSS.before	times	ASPECTS	oplastime	NIHSS.24h	mRS	group	whitecell.density	fibrin.per	redcell.per	PLT
1	Atrium	5	0	1	1	1	0	0	0	0	0	0	NA	NA	NA	NA	NA	NA	2	17.8499	0.516536	0.180527	0.302937
2	Atrium	5	0	1	0	0	0	0	0	0	0	1	NA	NA	NA	NA	NA	NA	2	168.178	0.32223	0.394337	0.283433
3	Atrium	5	0	1	0	0	0	0	0	1	0	0	NA	NA	NA	NA	NA	NA	2	35.0316	0.746097	0.206706	0.0471963
4	Atrium	5	0	1	0	1	0	0	0	0	0	0	NA	NA	NA	NA	NA	NA	2	30.3795	0.516667	0.0987741	0.384559
5	Atrium	5	0	1	1	1	0	0	1	0	0	0	NA	NA	NA	NA	NA	NA	2	21.6436	0.791584	0.152724	0.0556914
6	Atrium	5	0	1	0	1	0	0	0	0	0	0	NA	NA	NA	NA	NA	NA	2	61.6625	0.686159	0.253547	0.0602949
7	Atrium	5	0	1	1	1	0	0	1	0	0	0	NA	NA	NA	NA	NA	NA	2	171.613	0.376023	0.272269	0.351708
8	Atrium	5	0	1	0	1	0	1	0	0	0	0	NA	NA	NA	NA	NA	NA	2	123.77	0.548648	0.225238	0.226115
9	Atrium	5	0	1	0	1	0	0	0	0	0	0	NA	NA	NA	NA	NA	NA	2	37.5112	0.64904	0.336726	0.0142344
10	Atrium	5	0	1	1	1	0	1	0	0	0	0	NA	NA	NA	NA	NA	NA	2	316.699	0.460694	0.409545	0.129761
11	Atrium	5	0	1	0	0	3	1	1	0	0	0	NA	NA	NA	NA	NA	NA	2	196.973	0.539818	0.309846	0.150337
12	Atrium	5	0	1	1	1	0	0	0	0	0	0	NA	NA	NA	NA	NA	NA	2	107.25	0.341541	0.412159	0.246299
13	CE	1	0	0	0	0	3	1	1	1	1	0	14	1	10	38.5	12	4	1	160.26	0.08665	0.457828	0.455522
14	CE	1	0	1	0	0	3	0	0	0	0	0	11	1	9	19	3	2	1	416.144	0.507582	0.108086	0.384332
15	CE	1	0	1	0	0	2	0	0	0	0	0	12	1	10	13	1	1	1	28.0206	0.440519	0.520682	0.0387994
16	CE	1	0	1	1	0	2	0	0	0	0	0	15	2	10	46	15	4	1	179.664	0.552214	0.360324	0.0874615
17	CE	1	1	0	0	0	0	0	1	0	0	0	19	2	7	46	12	4	1	319.309	0.576153	0.232159	0.191689
18	CE	1	1	0	0	0	0	0	1	0	0	0	23	1	10	15	20	4	1	157.567	0.352409	0.326595	0.320995
19	CE	1	1	0	0	0	0	1	0	1	0	0	6	1	9	31	0	0	1	34.7211	0.596158	0.17611	0.227731
20	CE	1	0	0	0	0	2	1	1	1	1	0	21	2	7	38.5	35	6	1	32.5551	0.233302	0.62584	0.140858
21	CE	1	0	0	0	1	0	0	0	1	1	0	19	3	8	34	13	2	1	469.332	0.303832	0.346469	0.349699
22	CE	1	0	1	0	1	0	0	1	1	0	0	16	4	4	33	12	2	1	98.0592	0.406917	0.378572	0.214512
23	CE	1	0	1	0	1	1	0	0	0	0	0	15	1	5	15	14	5	1	271.661	0.14573	0.402682	0.451588
24	CE	1	0	1	0	1	0	0	0	0	0	0	14	2	10	30	10	2	1	309.974	0.559229	0.391622	0.0491492
25	CE	1	0	0	0	1	0	0	0	0	0	0	23	2	10	32	23	3	1	91.5994	0.561017	0.0581134	0.38087
26	CE	1	0	0	0	1	0	0	1	0	0	0	13	1	9	34	6	1	1	201.121	0.311858	0.331363	0.356779
27	CE	1	0	0	1	1	3	0	0	0	0	0	17	3	10	106	10	3	1	249.505	0.526367	0.288914	0.184719
28	CE	1	0	0	0	1	3	0	0	0	0	0	15	5	10	59	8	2	1	306.327	0.649888	0.265707	0.0844044
29	CE	1	0	0	1	1	3	1	1	0	0	0	20	1	9	29	22	4	1	258.934	0.355365	0.542352	0.102283
30	CE	1	0	0	0	1	0	0	0	0	0	0	12	1	7	26	6	1	1	179.535	0.4401	0.264374	0.295526
31	CE	1	0	1	0	1	2	0	0	0	0	0	9	1	10	76	3	2	1	193.34	0.225255	0.61383	0.160916
32	CE	1	0	0	0	0	0	0	0	0	0	0	18	1	9	17	6	1	1	117.655	0.290277	0.562292	0.147431
33	CE	1	0	0	0	1	0	0	0	0	0	0	24	3	10	97	8	2	1	334.454	0.392946	0.188371	0.418683
34	CE	1	0	1	1	1	0	0	1	0	0	0	37	1	10	22	17	5	1	26.0711	0.244438	0.580829	0.174733
35	CE	1	0	1	0	1	0	0	0	0	0	0	20	1	5	23	2	0	1	57.4741	0.263477	0.419001	0.317522
36	CE	1	0	1	0	1	0	0	0	0	0	0	6	1	10	47	3	1	1	240.282	0.349863	0.432106	0.218031
37	CE	1	0	0	0	1	0	0	1	0	0	0	17	1	10	15	15	2	1	134.168	0.284865	0.338157	0.376978
38	CE	1	0	0	1	1	0	0	0	0	0	0	17	1	10	25	5	1	1	305.654	0.389201	0.318407	0.292393
39	CE	1	0	1	0	1	0	0	0	0	0	1	20	2	10	80	10	2	1	260.658	0.531068	0.233738	0.235194
40	CE	1	0	1	0	1	2	0	1	0	0	0	25	1	10	82	35	6	1	349.425	0.528387	0.297135	0.174478
41	CE	1	0	0	0	0	0	0	1	1	0	1	16	3	4	62	35	6	1	284.878	0.572696	0.246128	0.181176
42	CE	1	0	1	0	1	1	0	0	0	0	0	18	1	4	24	2	0	1	93.6772	0.488586	0.439401	0.0720132
43	CE	1	0	1	1	1	3	1	0	0	0	1	22	9	8	239	22	6	1	150.735	0.69344	0.164559	0.142001
44	CE	1	0	0	0	1	0	0	1	0	0	0	13	11	3	256	11	2	1	220.23	0.395469	0.219698	0.384833
45	CE	1	0	0	0	1	0	1	0	0	0	0	18	1	7	20	1	0	1	105.558	0.0165193	0.541943	0.441538
46	CE	1	0	1	0	1	0	0	1	0	0	0	12	1	10	22	10	2	1	407.609	0.241882	0.433796	0.324321
47	CE	1	0	1	0	1	2	0	0	0	0	0	22	2	10	36	8	1	1	200.264	0.412115	0.430628	0.157257
48	CE	1	0	1	0	1	0	1	0	0	0	0	12	3	6	61	6	5	1	76.348	0.243244	0.553679	0.203078
49	CE	1	1	0	1	1	2	0	0	0	0	0	14	1	8	64	17	3	1	168.761	0.402641	0.244872	0.352487
50	CE	1	1	0	1	1	0	0	0	1	0	0	4	1	10	34	10	3	1	87.563	0.299827	0.382448	0.317725
51	CE	1	1	0	0	1	3	0	0	0	0	0	18	4	10	44	18	4	1	147.37	0.412762	0.549983	0.0372543
52	CE	1	1	1	0	0	2	0	0	1	0	0	14	3	10	74	10	1	1	183.108	0.392977	0.194683	0.41234
53	CE	1	1	0	0	0	0	0	0	1	0	0	14	3	10	54	14	2	1	158.158	0.675725	0.113529	0.210746
54	CE	1	1	1	0	1	3	0	1	0	0	0	19	1	5	30	15	2	1	238.931	0.0594165	0.361181	0.579402
55	CE	1	1	0	0	0	0	0	0	1	0	0	2	1	10	64	2	1	1	184.306	0.431031	0.33568	0.233289
56	CE	1	1	1	1	1	1	1	1	0	0	1	20	1	10	22	29	5	1	243.168	0.3122	0.486938	0.200862
57	CE	1	1	0	0	1	3	0	0	0	0	0	15	1	10	27	7	2	1	234.421	0.0736453	0.657068	0.269287
58	CE	1	1	1	1	1	3	1	1	0	0	0	16	2	8	37	14	3	1	161.245	0.25026	0.344994	0.404746
59	LAA	2	0	0	0	0	0	0	0	1	1	0	16	1	8	38.5	12	1	1	296.2	0.0971335	0.426366	0.476501
60	LAA	2	0	0	0	0	3	1	0	1	1	0	15	1	10	21	2	2	1	150.167	0.498256	0.145047	0.356698
61	LAA	2	0	0	0	0	1	1	1	0	1	0	4	1	10	46	4	2	1	424.308	0.472139	0.320943	0.206918
62	LAA	2	0	1	1	0	2	0	1	0	0	0	15	2	9	33	16	2	1	337.246	0.309799	0.386751	0.30345
63	LAA	2	0	0	0	0	3	1	1	1	0	0	13	1	10	24	9	4	1	106.489	0.504356	0.40017	0.0954742
64	LAA	2	0	0	0	0	3	1	1	0	0	0	38	1	10	26	10	5	1	82.7495	0.525263	0.407604	0.0671333
65	LAA	2	0	0	1	0	2	1	1	0	0	0	12	2	10	92	5	3	1	150.017	0.507687	0.147588	0.344725
66	LAA	2	1	0	0	0	1	0	0	0	0	0	7	2	9	40	7	3	1	313.533	0.116193	0.419737	0.46407
67	LAA	2	0	0	1	0	1	1	0	0	0	0	11	2	10	74	11	3	1	229.395	0.166503	0.521294	0.312203
68	LAA	2	0	0	0	0	1	0	1	0	0	0	16	2	10	36	4	2	1	275.522	0.156781	0.362184	0.481035
69	LAA	2	0	0	0	0	0	1	1	0	0	0	32	2	10	82	10	2	1	229.438	0.00120785	0.538055	0.460738
70	LAA	2	0	0	0	0	2	1	1	1	1	0	20	2	10	54	3	0	1	265.167	0.451585	0.527242	0.0211732
71	LAA	2	0	0	1	0	3	0	1	1	0	0	6	1	9	81	6	2	1	14.1505	0.0922669	0.573826	0.333907
72	LAA	2	0	1	1	1	2	0	1	0	0	0	22	3	9	66	18	4	1	40.1019	0.184268	0.672502	0.14323
73	LAA	2	1	0	0	0	1	1	1	0	0	0	17	2	10	0	11	6	1	19.1959	0.294904	0.4	0.305096
74	LAA	2	1	0	0	0	3	1	0	0	0	0	31	1	7	81	10	5	1	14.7027	0.121446	0.618662	0.259892
75	LAA	2	0	0	0	1	0	0	0	0	0	0	11	3	10	25	10	6	1	269.001	0.457679	0.518489	0.0238321
76	LAA	2	0	0	0	0	0	0	1	1	1	0	17	2	10	75	17	4	1	386.988	0.556472	0.434936	0.00859147
77	LAA	2	1	0	0	0	0	0	0	1	1	0	20	4	8	38.5	17	2	1	94.517	0.556785	0.364867	0.0783473
78	LAA	2	0	0	1	0	0	0	0	0	0	0	23	2	9	56	16	2	1	261.13	0.45	0.5	0.05
79	LAA	2	0	1	0	0	0	0	0	0	0	0	19	2	10	54	3	0	1	179.65	0.128773	0.519049	0.352178
80	LAA	2	0	1	0	0	0	0	1	0	0	0	6	1	9	81	6	2	1	116.93	0.179774	0.642664	0.177562
81	LAA	2	0	1	0	0	1	0	1	0	0	0	12	2	10	74	11	3	1	9.29832	0.172414	0.503	0.324613
82	LAA	2	0	1	0	0	1	0	0	0	0	0	16	2	10	36	4	2	1	24.42	0.247396	0.557306	0.195298
83	LAA	2	1	0	0	0	1	0	0	0	0	0	7	2	9	40	7	3	1	213.533	0.126193	0.409737	0.45907
84	SOE	3	0	0	0	0	1	0	0	1	0	0	15	2	9	82	9	1	1	50.0226	0.39	0.39	0.22
85	SOE	3	0	0	0	0	0	0	0	0	0	0	4	2	8	70	1	0	1	200.966	0.4	0.27	0.33
86	SOE	3	0	0	0	0	0	0	0	0	0	0	21	3	10	44	12	3	1	114.493	0.0623766	0.56754	0.370084
87	SOE	3	0	1	0	0	0	0	0	0	0	0	14	1	6	24	6	2	1	285.132	0.33	0.33	0.34
88	SOE	3	1	0	0	0	0	1	0	0	0	0	16	2	8	38.5	10	2	1	127.277	0.216432	0.31	0.473568
89	SOE	3	0	0	0	0	0	0	0	0	0	0	18	3	7	68	13	1	1	106.277	0.316432	0.22	0.453568
90	SUE	4	0	0	0	0	0	0	1	0	0	0	35	1	7	30	31	6	1	60.5504	0.653744	0.320187	0.0260683
91	SUE	4	0	1	0	0	0	0	0	0	0	0	11	1	10	16	9	4	1	69.6465	0.601016	0.312076	0.0869073
92	SUE	4	0	0	0	0	0	1	1	0	0	0	17	2	7	53	35	6	1	244.642	0.291806	0.379601	0.328593
93	SUE	4	0	0	0	0	0	0	0	0	0	0	27	1	10	83	34	6	1	279.866	0.45396	0.309316	0.236724
94	SUE	4	0	0	0	0	3	0	1	0	0	0	19	1	9	38.5	10	3	1	189.94	0.337475	0.485812	0.176713
95	SUE	4	1	0	0	0	2	1	0	1	1	0	17	2	10	22	17	4	1	229.309	0.479213	0.27842	0.242368
96	SUE	4	1	0	0	0	0	0	1	0	0	0	7	3	10	133	12	3	1	167.168	0.459731	0.280115	0.260154
97	SUE	4	1	0	1	0	0	0	1	1	0	0	5	3	10	62	0	0	1	33.8194	0.472006	0.5	0.0279945
98	SUE	4	0	1	0	0	0	1	1	0	0	0	27	10	10	165	30	6	1	297.079	0.541582	0.438075	0.0203428
99	SUE	4	1	1	0	0	1	0	0	1	0	0	19	5	10	56	32	6	1	126.4	0.117669	0.588903	0.293427
100	SUE	4	0	0	0	0	1	0	1	0	0	0	20	2	8	78	14	2	1	201.45	0.372006	0.4	0.0278449
101	Plaque	6	0	0	0	0	0	1	1	1	0	0	NA	NA	NA	NA	NA	NA	1	51.2116	0.555306	0.443899	0.000794322
102	Plaque	6	0	0	0	0	0	0	0	1	0	0	NA	NA	NA	NA	NA	NA	1	241.941	0.460825	0.510301	0.0288741
103	Plaque	6	0	1	0	0	1	0	1	0	0	0	NA	NA	NA	NA	NA	NA	1	9.29832	0.172414	0.503	0.324613
104	Plaque	6	0	1	0	0	1	0	0	0	0	0	NA	NA	NA	NA	NA	NA	1	24.42	0.247396	0.557306	0.195298
105	Plaque	6	0	0	0	0	0	0	1	0	0	0	NA	NA	NA	NA	NA	NA	1	113.45	0.128773	0.519049	0.352178
106	Plaque	6	0	0	1	0	1	0	1	1	1	0	NA	NA	NA	NA	NA	NA	1	175.681	0.179774	0.642664	0.177562
107	Plaque	6	0	0	0	0	0	1	0	0	0	0	NA	NA	NA	NA	NA	NA	1	216.03	0.555306	0.443899	0.000794322
108	Plaque	6	0	1	0	0	0	0	1	0	0	0	NA	NA	NA	NA	NA	NA	1	645.21	0.440825	0.480301	0.088741
109	Plaque	6	0	0	0	0	0	1	0	0	1	0	NA	NA	NA	NA	NA	NA	1	552.01	0.272414	0.403	0.324613
110	Plaque	6	0	0	0	0	1	0	0	0	0	0	NA	NA	NA	NA	NA	NA	1	293.82	0.257396	0.547306	0.195298
111	Plaque	6	0	1	0	0	0	0	0	0	0	0	NA	NA	NA	NA	NA	NA	1	179.65	0.128773	0.519049	0.352178

## Sheet: Sheet1
		fibrin	RBC	BLAND	WBC	total area pixels
169263	1		1129369	789516	128	3145728
	2		748071	351599	151	3145728
	3		809842	175259	304	3145728
	4		563908	296865	80	3145728
	5		996794	118611	104	3145728
	6		1198763	61819	146	3145728
	7		858448	22928	126	3145728
	8		809442	53474	141	3145728
	9		1414243	752868	25	3145728
	10		1179427	746056	10	3145728
202126	1		720829	246007	70	3145728
	2		608186	179678	32	3145728
	3		543444	69372	32	3145728
	4		426367	174348	167	3145728
	5		571330	114689	70	3145728
	6		652529	540186	84	3145728
	7		572974	164198	193	3145728
	8		386102	129529	121	3145728
	9		417255	251498	143	3145728
	10		557446	101957	106	3145728
202654	1		1602656	167453	683	3145728
	2		2067315	283100	93	3145728
	3		1991787	233735	24	3145728
	4		2115012	199427	40	3145728
	5		1658886	86494	5	3145728
	6		1254978	62883	280	3145728
	7		1490095	64448	210	3145728
	8		2209033	621678	10	3145728
	9		1111713	0	583	3145728
	10		1518218	141533	664	3145728
203022	1		2001994	0	190	3145728
	2		1107532	87171	134	3145728
	3		2091888	0	541	3145728
	4		1931935	18237	232	3145728
	5		2096410	14642	145	3145728
	6		1422859	0	630	3145728
	7		1907462	38952	15	3145728
	8		1600289	32002	464	3145728
	9		2471401	79743	15	3145728
	10		2783237	96273	5	3145728
203274	3		1244746	941402	153	3145728
	4		1204956	625609	160	3145728
	5		178757	389723	29	3145728
	6		1689347	466088	195	3145728
	7		946212	603089	124	3145728
	8		1790148	129287	300	3145728
	9		1744744	176406	163	3145728
	10		1799499	18607	118	3145728
	1		1661375	348042	205	3145728
	2		1095694	474784	325	3145728
204786	2		19623	2168652	14	3145728
205403	1		902120	177663	315	3145728
	2		559073	149190	500	3145728
	3		198978	466914	168	3145728
	4		519118	162575	566	3145728
	5		643917	22239	497	3145728
	6		755501	28522	485	3145728
	7		244791	309931	160	3145728
	8		405702	0	574	3145728
	9		776553	17528	315	3145728
	10		1496104	20334	374	3145728
207363	1		1296480	109480	1004	3145728
	2		1513880	556463	872	3145728
	3		327477	1470123	316	3145728
	4		1237085	756001	586	3145728
	5		1263287	662343	446	3145728
	6		1560704	463309	598	3145728
	7		1725009	226280	948	3145728
	8		2642930	24702	1074	3145728
	9		1791499	37180	859	3145728
	10		1670610	91413	886	3145728
220773	4		830439	292809	157	3145728
	5		439568	116129	420	3145728
	6		642037	57094	387	3145728
	7		474261	58997	248	3145728
	8		537552	51744	108	3145728
228387	1		2643650	0	284	3145728
	2		2755731	0	390	3145728
	3		2456748	44681	205	3145728
	4		2202299	22721	437	3145728
	5		2510460	12822	869	3145728
	6		2416790	0	172	3145728
	7		2597585	0	557	3145728
	8		2459979	37248	168	3145728
	9		1860171	30729	337	3145728
	10		2187823	0	266	3145728
237070	3		1090582	220762	0	3145728
	4		1650686	147964	2	3145728
	5		1540870	75692	10	3145728
	6		873559	88887	4	3145728
	7		1158166	132152	3	3145728
	8		1367389	388719	4	3145728
	9		1408868	140780	446	3145728
	10		289422	41882	40	3145728
	11		330043	0	267	3145728
	12		1550555	485401	6	3145728
239525	1		899149	596952	35	3145728
	2		1426335	1372761	2	3145728
	3		1373051	251174	5	3145728
	4		1271501	881039	7	3145728
	5		1114291	914624	6	3145728
	6		1248296	38943	1	3145728
	7		1334647	1418236	12	3145728
	8		1510088	437701	35	3145728
	9		1368663	757666	263	3145728
	10		1310476	887741	2	3145728
